# Supplementary material
Source: publisher site journal article supplement (https://www.dovepress.com/article/288259)

# Supplementary material

# The DNA Sequences of β-tubulin，D1D2 and ITS to identify *Sporothrix globosa*

**01-β-tubulin (BT)**

**BT2A-S1.BT2A.7406909.H02 (forward sequence)**

GTTTGATCCTTGGACTGGACGCAAGTTATGTTAACGAAGGTATAGGCAGCAGATTTCTGGCGAGCACGGCCTCGACAACAATGGCGTCTACAACGGCACCTCGGACCTCCAGCTGGAGCGTCTGAGCGTCTACTTCAACGAGGTTTGTTTTTTGGTTTACCTACCGGCTTTGGTGTCACGTCACAGTTTTGGCACGATTCTAACAATTTTTGATAGGCCTCTGGCAACAAGTACGTCCCCCGTGCCGTCCTGGTCGATCTCGAGCCCGGTACCATGGATGCCGTCCGTGCCGGTCCTTTCGGTCAGCTGTTCCGTCCCGACAACTTCGTTTTCGGCCAGTCGGGTGCCGGCAACAACTGGGCCAAGGGTCACTCACCTGAGGGTAAAAC

**BT2A-S1.BT2B.7406910.H03 (reverse sequence)**

CGGCCCGACTGGCCGAACGAAGTTGTCGGGACGGAACAGCTGACCGAAAGGACCGGCACGGACGGCATCCATGGTACCGGGCTCGAGATCGACCAGGACGGCACGGGGGACGTACTTGTTGCCAGAGGCCTATCAAAAATTGTTAGAATCGTGCCAAAACTGTGACGTGACACCAAAGCCGGTAGGTAAACCAAAAAACAAACCTCGTTGAAGTAGACGCTCAGACGCTCCAGCTGGAGGTCCGAGGTGCCGTTGTAGACGCCATTGTTGTCGAGGCCGTGCTCGCCAGAAATCTGCTGCCTATACCTTCGTTAACATAACTTGCGTCCAGTCCAAGGATTCAAACGCTCGTTGTACATACCAGAAAGCAGCACCGATTTTGGTTACCAAAG

**Trimmed-*Sporothrix globosa* (assembly sequence)**

TCCTTGGACTGGACGCAAGTTATGTTAACGAAGGTATAGGCAGCAGATTTCTGGCGAGCACGGCCTCGACAACAATGGCGTCTACAACGGCACCTCGGACCTCCAGCTGGAGCGTCTGAGCGTCTACTTCAACGAGGTTTGTTTTTTGGTTTACCTACCGGCTTTGGTGTCACGTCACAGTTTTGGCACGATTCTAACAATTTTTGATAGGCCTCTGGCAACAAGTACGTCCCCCGTGCCGTCCTGGTCGATCTCGAGCCCGGTACCATGGATGCCGTCCGTGCCGGTCCTTTCGGTCAGCTGTTCCGTCCCGACAACTTCGTT

**The Blast result of assembly sequence as query (**https://blast.nlm.nih.gov/Blast.cgi)


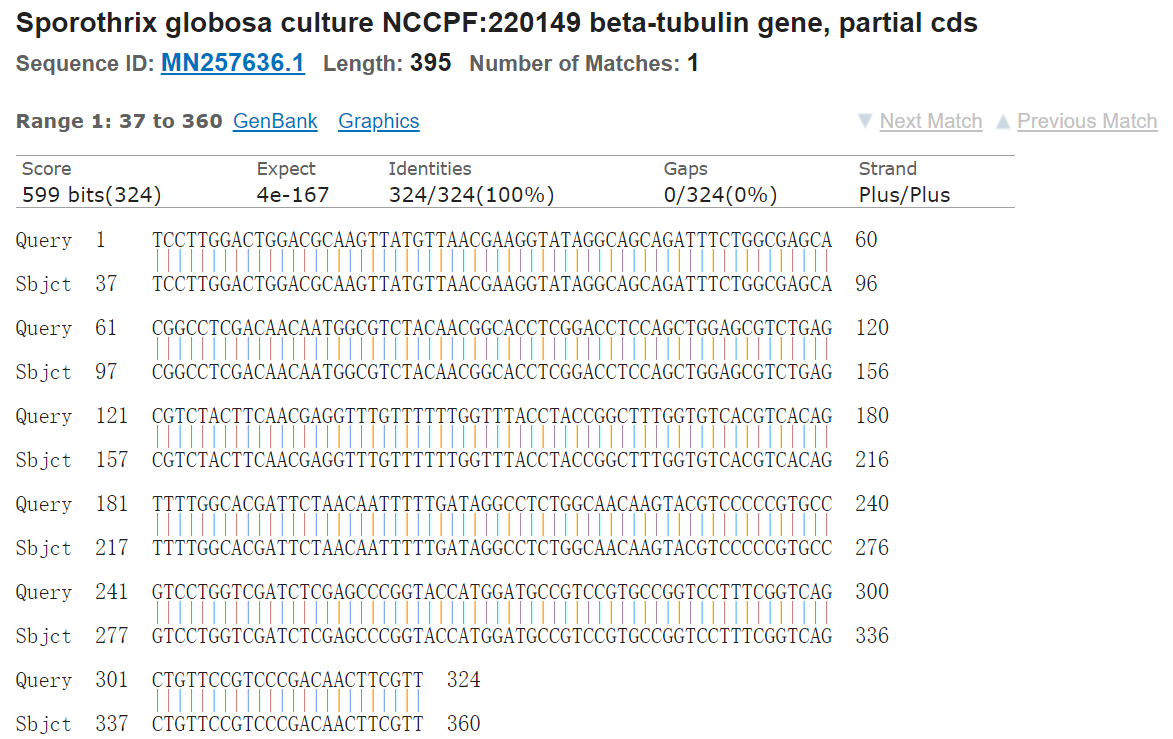


**02-D1D2**

**F63-S1.F63.7406905.G10 (forward sequence)**

ATGCATTGCCCAGTACGGCGAGTGAAGCGGCAACAGCTCAAATTTGAAATCTGGCCCCCCGGCCCGAGTTGTAATTTGGAGAGGATGCTTCTGGCGCGGCGCCGTCCGAGTTCCTTGGAACAGGACGCCACAGAGGGTGAGAGCCCCGTACGGACGGACGCCTAGCCTCTACGAAGCTCCTTCGACGAGTCGAGTAGTTTGGGAATGCTGCTCAAAATGGGAGGTAAATTTCTTCTAAAGCTAAATACCGGCCAGAGACCGATAGCGCACAAGTAGAGTGATCGAAAGATGAAAAGCACTTTGAAAAGAGGGTTAAAAAGTACGTGAAATTGTTGAAAGGGAAGCGCCTGTGACCAGACTTGCGCCTCGCGGACCACCCGGCGTTCTCGCCGGTGCACTCTGCGTGGCGCAGGCCAGCATCGGTTCTCCCAGGGGGACAAAGGCCGCGGGAACGTAGCTCCTTTGGGAGTGTTATAGCCCGCGGCGGCATGCCCCTGGGGGGACCGAGGACCGCGCTTCGGCAAGGATGCTGGCGTAATGGTCACCAGCGACCCGTCTTGAA

**F63-S1.R635.7406906.G11 (reverse sequence)**

CGCTCCTTGCCGAGCGCGGTCCTCGGTCCCCCCAGGGGCATGCCGCCGCGGGCTATAACACTCCCAAAGGAGCTACGTTCCCGCGGCCTTTGTCCCCCTGGGAGAACCGATGCTGGCCTGCGCCACGCAGAGTGCACCGGCGAGAACGCCGGGTGGTCCGCGAGGCGCAAGTCTGGTCACAGGCGCTTCCCTTTCAACAATTTCACGTACTTTTTAACCCTCTTTTCAAAGTGCTTTTCATCTTTCGATCACTCTACTTGTGCGCTATCGGTCTCTGGCCGGTATTTAGCTTTAGAAGAAATTTACCTCCCATTTTGAGCAGCATTCCCAAACTACTCGACTCGTCGAAGGAGCTTCGTAGAGGCTAGGCGTCCGTCCGTACGGGGCTCTCACCCTCTGTGGCGTCCTGTTCCAAGGAACTCGGACGGCGCCGCGCCAGAAGCATCCTCTCCAAATTACAACTCGGGCCGGGGGGCCAGATTTCAAATTTGAGCTGTTGCCGCTTCACTCGCCGTTACTGGGGCAATCCCTGTTGGTTTCTTTTCCTCCGCTATTTGGAATATGAAAAA

**Trimmed-*Sporothrix globosa* (assembly sequence)**

CGGCGAGTGAAGCGGCAACAGCTCAAATTTGAAATCTGGCCCCCCGGCCCGAGTTGTAATTTGGAGAGGATGCTTCTGGCGCGGCGCCGTCCGAGTTCCTTGGAACAGGACGCCACAGAGGGTGAGAGCCCCGTACGGACGGACGCCTAGCCTCTACGAAGCTCCTTCGACGAGTCGAGTAGTTTGGGAATGCTGCTCAAAATGGGAGGTAAATTTCTTCTAAAGCTAAATACCGGCCAGAGACCGATAGCGCACAAGTAGAGTGATCGAAAGATGAAAAGCACTTTGAAAAGAGGGTTAAAAAGTACGTGAAATTGTTGAAAGGGAAGCGCCTGTGACCAGACTTGCGCCTCGCGGACCACCCGGCGTTCTCGCCGGTGCACTCTGCGTGGCGCAGGCCAGCATCGGTTCTCCCAGGGGGACAAAGGCCGCGGGAACGTAGCTCCTTTGGGAGTGTTATAGCCCGCGGCGGCATGCCCCTGGGGGGACCGAGGACCGCGCT

**The Blast result of assembly sequence as query (**https://blast.nlm.nih.gov/Blast.cgi**)**


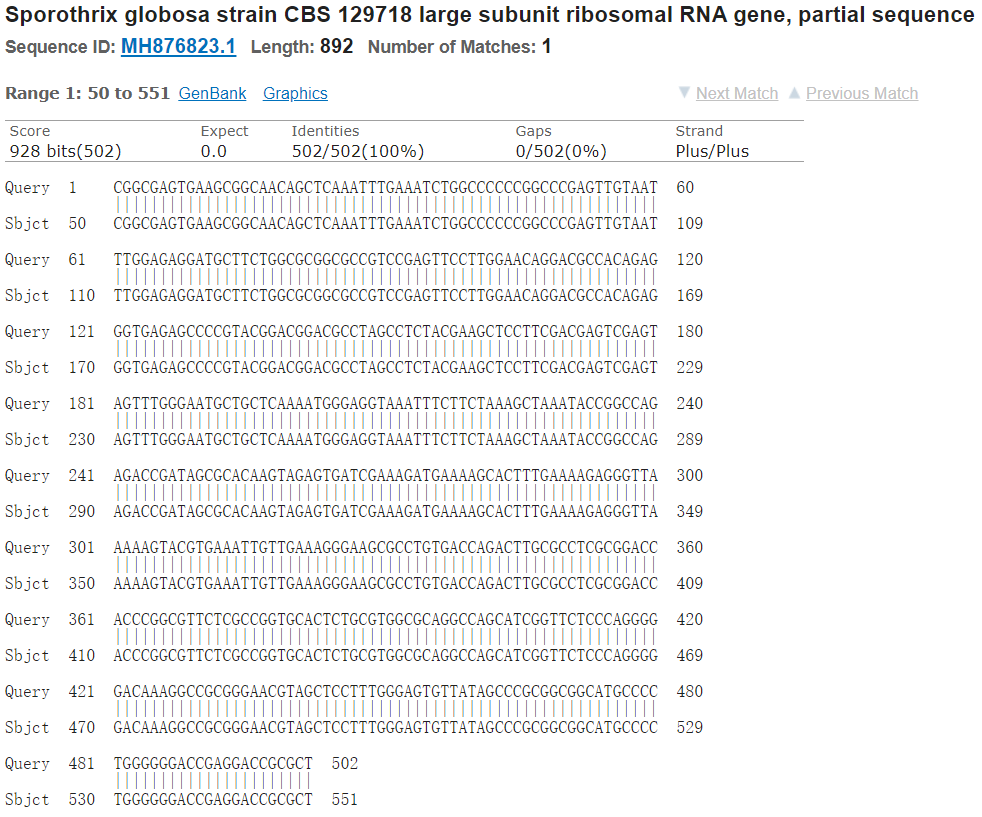


**03-ITS**

**ITS-S1.ITS1.7198127.H05 (forward sequence)**

CCCTTGCGACCGTACCCAATCTCGTTCTCGTTGCTTCTGGCGGGGGGGGACGGGGGGGCGCCCGAGACGGCCCCCTCCGCCCCGCCCGCCAGGGGCGGCGGGCCCTACGAACCTTTGTATCTCAACCACTAGAAAACCGTCTGAGGAAAACAAACAAAATAATCAAAACTTTCAACAACGGATCTCTTGGCTCTGGCATCGATGAAGAACGCAGCGAAATGCGATACGTAATGTGAATTGCAGAATTCAGCGAACCATCGAATCTTTGAACGCACATTGCGCCCGCCAGCATTCTGGCGGGCATGCCTGTCCGAGCGTCATTTCCCCCCTCACGCGCCCCGTTGCGCGCTGGTGTTGGGGCGCCTCCGCCTGGCGGAGGCCCCCGAAAGCGAGTGGCGGGCCCTGTGGATGGCTCCGAGCGCAGTACCGAACGCAACGTTCTCCCTCGCTCCGGACGCCCCCCAGGTGCCCTGCCGTGAAAACGCGCATGACGTGCAACTCTTACCCAAGGTTGACCTCGGATCAGGTAGGACTACCCGCTGAACTTAAGCATATCTAA

**ITS-S1.ITS4.7198128.H06 (reverse sequence)**

CCTGATCCGAGGTCACCTTGGGTAAGAGTTGCACGTCATGCGCGTTTTCACGGCAGGGCACCTGGGGGGCGTCCGGAGCGAGGGAGAACGTTGCGTTCGGTACTGCGCTCGGAGCCATCCACAGGGCCCGCCACTCGCTTTCGGGGGCCTCCGCCAGGCGGAGGCGCCCCAACACCAGCGCGCAACGGGGCGCGTGAGGGGGGAAATGACGCTCGGACAGGCATGCCCGCCAGAATGCTGGCGGGCGCAATGTGCGTTCAAAGATTCGATGGTTCGCTGAATTCTGCAATTCACATTACGTATCGCATTTCGCTGCGTTCTTCATCGATGCCAGAGCCAAGAGATCCGTTGTTGAAAGTTTTGATTATTTTGTTTGTTTTCCTCAGACGGTTTTCTAGTGGTTGAGATACAAAGGTTCGTAGGGCCCGCCGCCCCTGGCGGCGGGGCGGGAGGGGGCCGTCTCGGGCGCCCCCCCGTCCCCCCCCGCCAGAAGCAACGAGAACGAGATTGGGTACGGTTCGCAAGGGTTGGGAGTTGTGAAAACTCTGTAATGATCCCTCCGCAGGCCCCCCTAACGGAGGTCA

**Trimmed-*Sporothrix globosa* (assembly sequence)**

CCCTTGCGAACCGTACCCAATCTCGTTCTCGTTGCTTCTGGCGGGGGGGGACGGGGGGGCGCCCGAGACGGCCCCCTCCCGCCCCGCCGCCAGGGGCGGCGGGCCCTACGAACCTTTGTATCTCAACCACTAGAAAACCGTCTGAGGAAAACAAACAAAATAATCAAAACTTTCAACAACGGATCTCTTGGCTCTGGCATCGATGAAGAACGCAGCGAAATGCGATACGTAATGTGAATTGCAGAATTCAGCGAACCATCGAATCTTTGAACGCACATTGCGCCCGCCAGCATTCTGGCGGGCATGCCTGTCCGAGCGTCATTTCCCCCCTCACGCGCCCCGTTGCGCGCTGGTGTTGGGGCGCCTCCGCCTGGCGGAGGCCCCCGAAAGCGAGTGGCGGGCCCTGTGGATGGCTCCGAGCGCAGTACCGAACGCAACGTTCTCCCTCGCTCCGGACGCCCCCCAGGTGCCCTGCCGTGAAAACGCGCATGACGTGCAACTCTTACCCAAGGT

**The Blast result of assembly sequence as query (**https://blast.nlm.nih.gov/Blast.cgi**)**


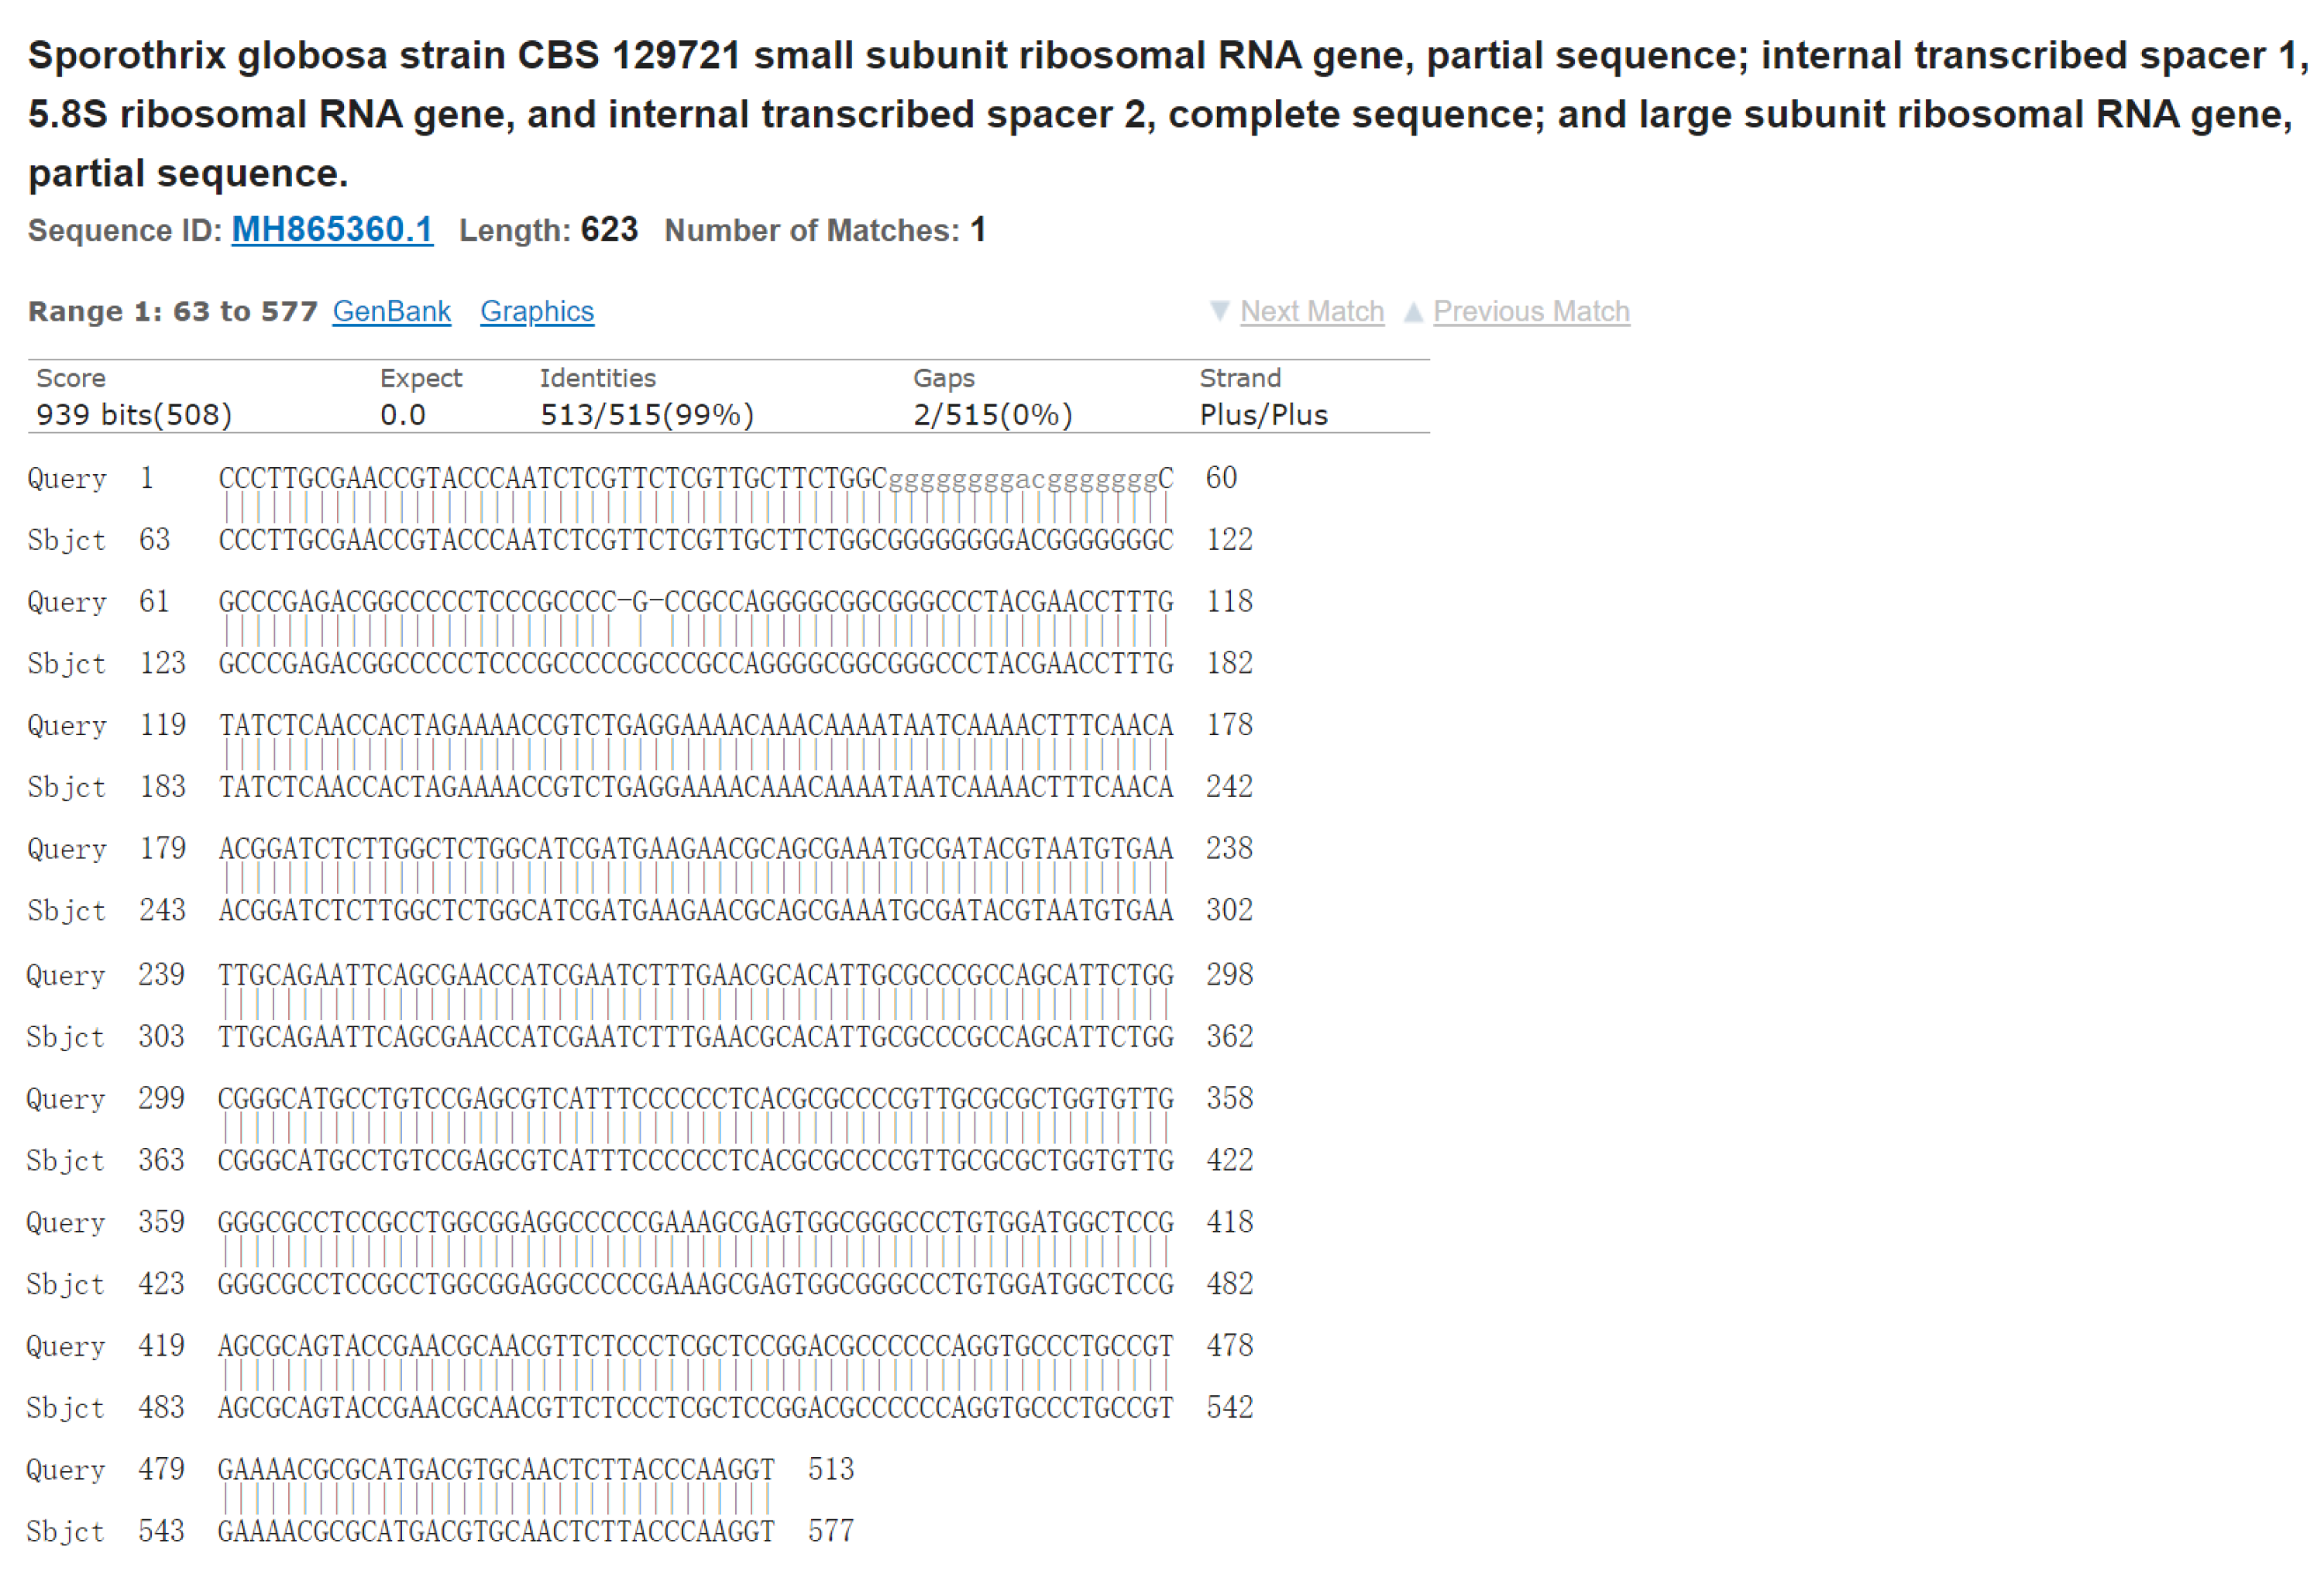

Supplement: Supplementary file 1 [file get_supplementary_file.php]
